# Supplementary material for: Two heptanuclear cluster-based 3D metal–organic frameworks with a good magnetocaloric effect
Source: Royal Society of Chemistry journal article supplement (doi:10.1039/d2ce01350a), 2022-11-25
Supplement: d2ce01350a1.pdf [file d2ce01350a1.pdf]

# Supplementary Material

## Two heptanuclear-based 3D metal-organic frameworks with good magnetocaloric effect

Shouying Cao<sup>a</sup>, Chenpeng Fan<sup>a</sup>, Mengwen Lu<sup>a</sup>, Meng Li<sup>a</sup>, Yuhang Zhou<sup>a</sup>, Hongxia Wang<sup>a</sup>, Qingfang Lin<sup>\*b</sup> and Lili Liang<sup>\*a</sup>

<sup>a</sup>Department of Chemistry, Bengbu Medical College, Bengbu 233030, China.

<sup>b</sup>United Laboratory for Future International Cooperation, Jilin University, China. E-mail: qingfang@jlu.edu.cn, cl12162@163.com

### Contents:

1. Materials and Methods.
2. Fig. S1 Coordination modes of Gd<sup>III</sup> atoms.
3. Fig. S2 The coordination modes of HCOO<sup>-</sup> and IDA<sup>-</sup>.
4. Fig. S3 The 3D extended structure of compound **1Gd**.
5. Fig. S4 Powder XRD patterns of **1Gd** and **2Dy**.
6. Fig. S5. FT-IR spectra of **1Gd**.
7. Fig. S6. FT-IR spectra of **2Dy**.
8. Fig. S7 TGA curves of **1Gd** under nitrogen.
9. Fig. S8 TGA curves of **2Dy** under nitrogen.
10. Fig S9. Plot of  $\chi_M^{-1}$  vs T for **1Gd** and **2Dy**.
11. Fig. S10. Representation of out-of-phase ( $\chi''$ ) (a) and in-phase ( $\chi'$ ) (b) frequency dependence of the ac susceptibility components for **2Dy** with zero field.
12. Table S1-S2 Selected bond lengths (Å) and bond angles (°) for **1Gd** and **2Dy**.
13. **Table S3**. The CShM (Continuous Shape Measurements) values of Gd<sup>III</sup> and Dy<sup>III</sup> atoms with a nona-coordinate mode.
14. **Table S4**.  $-\Delta S_m^{\max}$  value for some Gd<sup>III</sup>-based MOFs under  $\Delta H$  by the given temperature.

## Materials and Methods

All the chemicals needed for synthesis can be purchased from commercial sources and used as received without further purification. Powder X-ray diffraction data were performed on a Bruker D8X diffractometer equipped with monochromatized Cu-K $\alpha$  ( $\lambda = 1.5418 \text{ \AA}$ ) radiation at room temperature in the range of 5-50°. IR spectra were recorded with a NICOLET iS50 FT-IR spectrometer with KBr pellets in the range of 4000 to 500 cm $^{-1}$ . Single-crystal XRD data were obtained from a Bruker Apex II CCD with Mo-K $\alpha$  radiation ( $\lambda = 0.71073 \text{ \AA}$ ) at 293K. TG measurement was carried out on a Diamond thermogravimetric analyzer in flowing N $_2$  atmosphere from 27 to 800 °C with a heating rate of 10 °C min $^{-1}$ . The direct current magnetic data were measured at temperature between 2 and 300 K, and the magnetisation isothermal measurements were made in fields of between 0 and 7T on MPMS-XL7 SQUID magnetometer. Elemental analyses of C, H and N were performed on a Perkin-Elmer 240C Elemental Analyzer.

Crystal data of **1Gd**: C $_{15}$ H $_{38}$ Cl $_4$ Gd $_7$ N $_3$ O $_{32}$ ,  $M_r=2015.03$ , Hexagonal,  $P6_3/m$ ,  $a = 12.1692(5)$ ,  $b = 12.1692(5)$ ,  $c = 18.0220(11) \text{ \AA}$ ,  $V = 2311.3(2) \text{ \AA}^3$ ,  $Z = 2$ ,  $\mu = 10.220 \text{ mm}^{-1}$ ,  $\rho = 2.895 \text{ g.cm}^{-3}$ ,  $F(000) = 1842.0$ ,  $\theta_{\max} = 27.442^\circ$ . 18930 measured reflections, 1829 independent reflections. Based on these and 129 parameters,  $R_1=0.0145$  ( $I>2\sigma(I)$ ),  $wR_2=0.0746$  (all data) were obtained. GOF = 1.075. Crystal size (mm): 0.12 $\times$ 0.09 $\times$ 0.08.

Crystal data of **2Dy**: C $_{15}$ H $_{38}$ Cl $_4$ Dy $_7$ N $_3$ O $_{32}$ ,  $M_r=2051.74$ , Hexagonal,  $P6_3/m$ ,  $a = 12.0761(3)$ ,  $b = 12.0761(3)$ ,  $c = 17.8609(5) \text{ \AA}$ ,  $V = 2255.73(13) \text{ \AA}^3$ ,  $Z = 2$ ,  $\mu = 11.775 \text{ mm}^{-1}$ ,  $\rho = 3.016 \text{ g.cm}^{-3}$ ,  $F(000)= 1864.0$ ,  $\theta_{\max} = 26.495^\circ$ . 18339 measured reflections, 1592 independent reflections. Based on these and 125 parameters,  $R_1= 0.0427$  ( $I>2\sigma(I)$ ),  $wR_2= 0.0889$  (all data) were obtained. GOF = 1.134. Crystal size (mm): 0.1 x 0.1 x 0.1. CCDC 2203903 and 2203904 contain the supplementary crystallographic data for this paper. These data can be obtained free of charge from the Cambridge Crystallographic Data Centre.

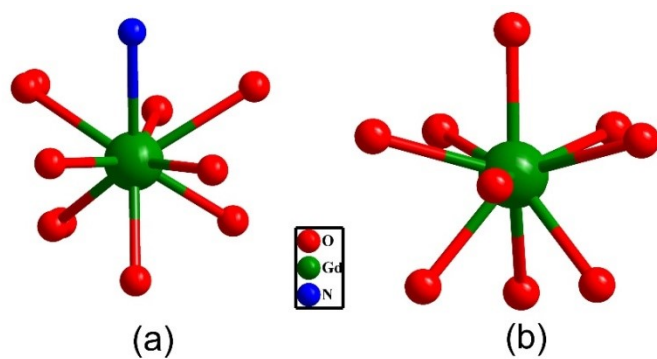

**Figure S1.** Two coordination modes of Gd<sup>III</sup> atoms.

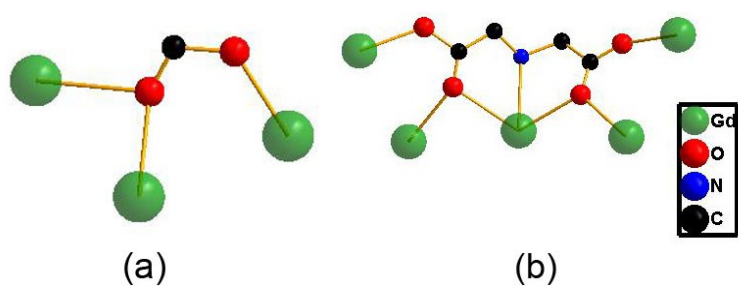

**Figure S2.** The coordination modes of HCOO<sup>-</sup> (a) and IDA<sup>-</sup> (b).

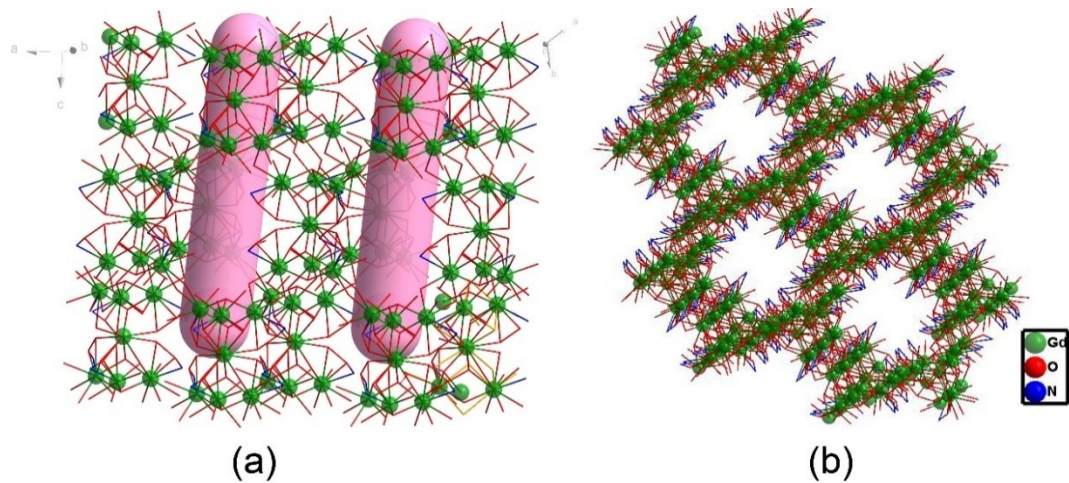

**Figure S3.** The 3D extended structure of compound 1Gd viewing the *b* (a) and *c* (b) axis.

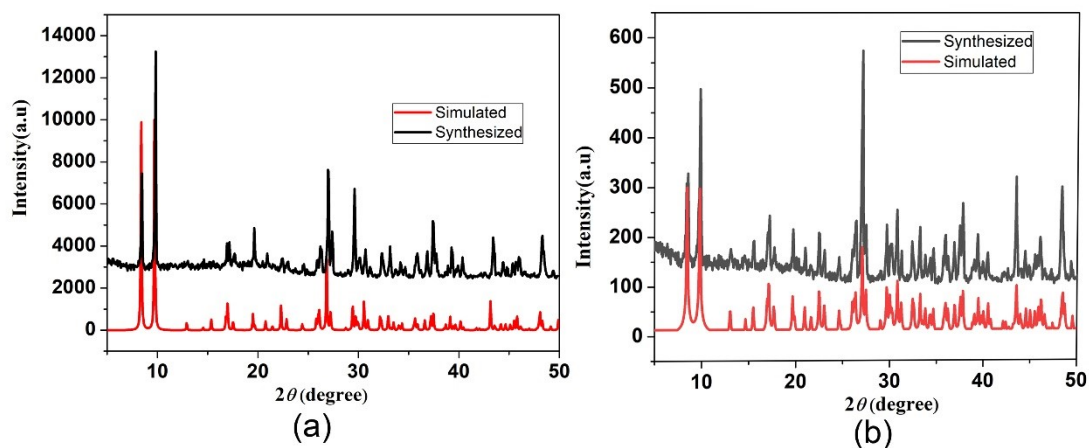

**Fig. S4.** PXRD patterns of **1Gd** (a) and **2Dy** (b).

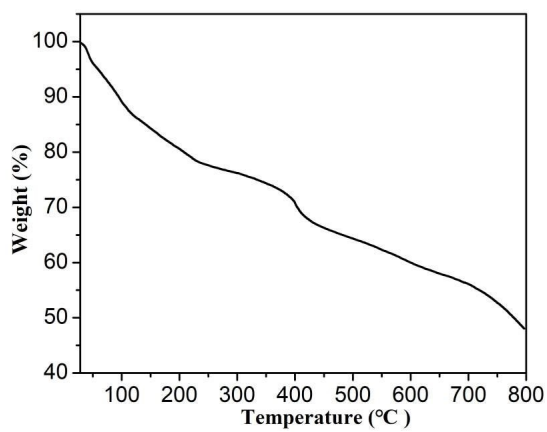

**Fig. S5.** TG curve of **1Gd**.

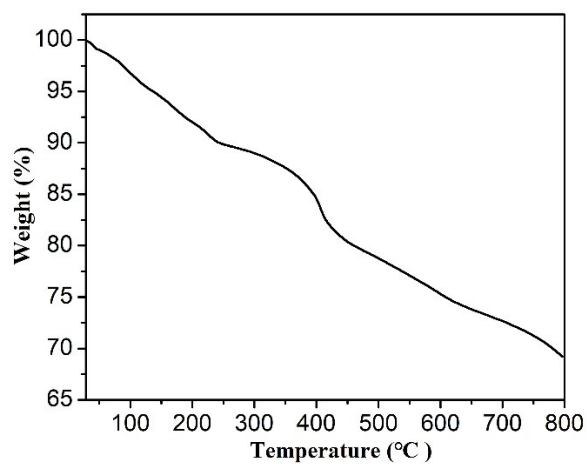

**Fig. S6.** TG curve of **2Dy**.

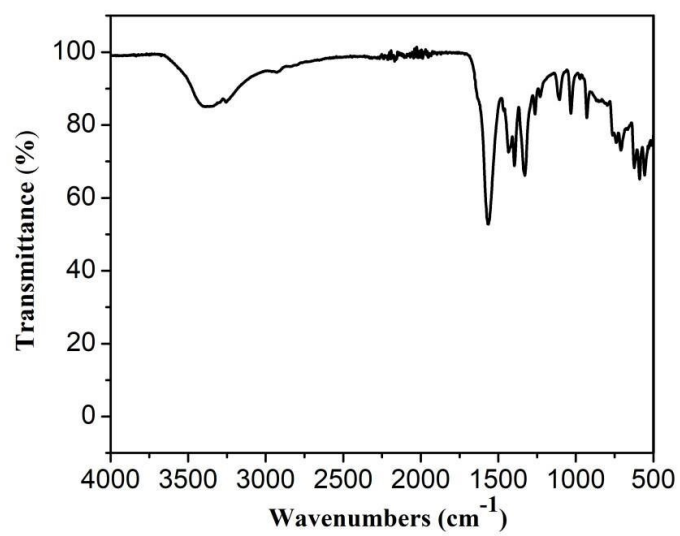

**Fig. S7.** FT-IR spectra of **1Gd**.

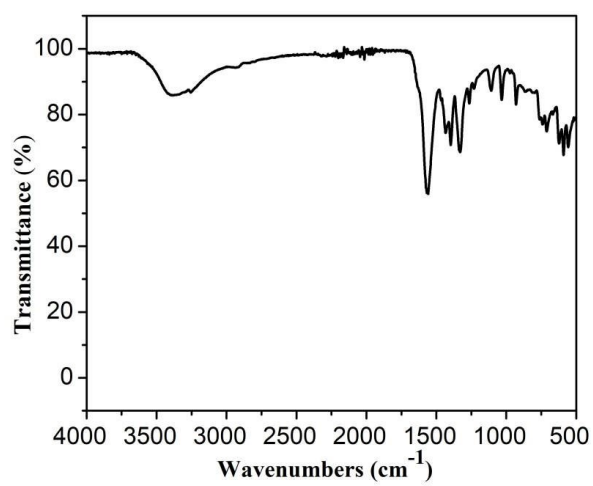

**Fig. S8.** FT-IR spectra of **2Dy**.

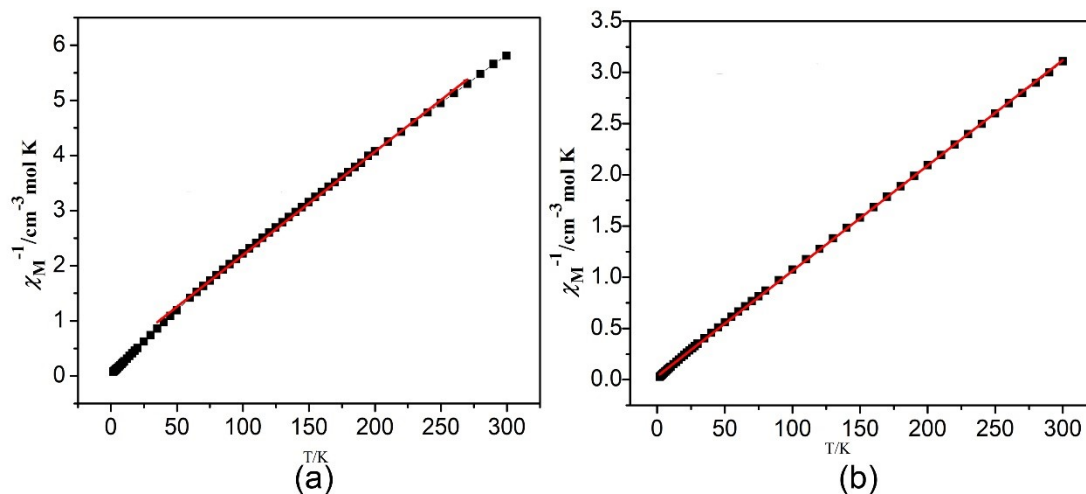

**Fig. S9.** (a) Plot of  $\chi_M^{-1}$  vs  $T$  for **1Gd**, fit from 270 – 35 K,  $c = 53.33 \text{ cm}^3 \text{ K mol}^{-1}$ ,  $\theta = -16.95 \text{ K}$ ; (b) Plot of  $\chi_M^{-1}$  vs  $T$  for **2Dy**, fit from 300 – 2 K,  $c = 97.18 \text{ cm}^3 \text{ K mol}^{-1}$ ,  $\theta = -3.10 \text{ K}$ .

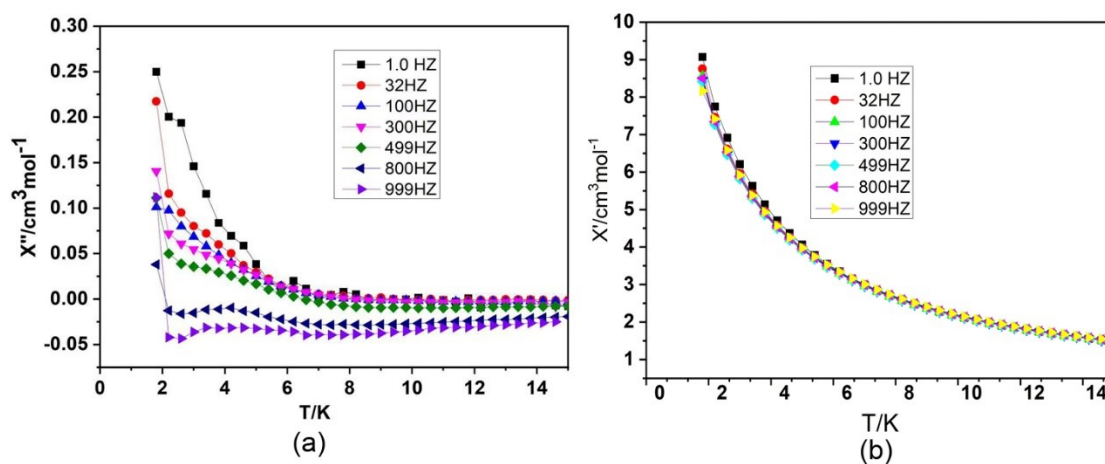

**Fig. S10.** Representation of weak out-of-phase ( $\chi''$ ) (a) and in-phase ( $\chi'$ ) (b) frequency dependence of the ac susceptibility components for **2Dy** with zero field.

**Table S1** Selected bond distances (Å) and bond angles (°) for **1 Gd**

| <b>1 Gd</b>         |           |                         |            |
|---------------------|-----------|-------------------------|------------|
| Gd2-O4              | 2.660(9)  | O1-Gd2-O4               | 111.9(2)   |
| Gd2-O5              | 2.417(3)  | O1-Gd2-N1               | 66.0(3)    |
| Gd2-O6              | 2.318(5)  | O5-Gd2-O1               | 129.1(2)   |
| Gd2-O6 <sup>5</sup> | 2.391(5)  | O5-Gd2-O4               | 118.7(3)   |
| Gd2-O7              | 2.479(6)  | O5-Gd2-O7               | 133.42(15) |
| Gd1-O4              | 2.542(10) | O5-Gd2-N1               | 136.1(3)   |
| Gd1-O6 <sup>4</sup> | 2.401(5)  | O6 <sup>5</sup> -Gd2-O1 | 139.00(17) |
| Gd1-O6 <sup>1</sup> | 2.401(5)  | O6-Gd2-O1               | 143.12(17) |
| Gd1-O6 <sup>3</sup> | 2.401(5)  | O6 <sup>5</sup> -Gd2-O4 | 60.9(2)    |
| Gd1-O65             | 2.401(5)  | O6-Gd2-O4               | 64.3(2)    |
| Gd1-O6 <sup>2</sup> | 2.401(5)  | O6-Gd2-O5               | 70.05(19)  |
| Gd1-O6              | 2.401(5)  | O6 <sup>5</sup> -Gd2-O5 | 68.88(19)  |
| Gd2-N1              | 2.600(12) | Gd2-O6-Gd22             | 110.27(19) |

Symmetry transformations used to generate equivalent atoms:

<sup>1</sup>+Y-X,1-X,3/2-Z; <sup>2</sup>+Y-X,1-X,+Z; <sup>3</sup>+X,+Y,3/2-Z; <sup>4</sup>1-Y,1+X-Y,3/2-Z; <sup>5</sup>1-Y,1+X-Y,+Z

**Table S2** Selected bond distances (Å) for and bond angles (°) **2 Dy**.

| <b>2 Dy</b>         |           |                          |          |
|---------------------|-----------|--------------------------|----------|
| Dy1-O1              | 2.399(4)  | O1-Dy1-O3 <sup>2</sup>   | 77.4(2)  |
| Dy1-O1W             | 2.443(6)  | O1-Dy1-O3                | 128.6(3) |
| Dy1-O2              | 2.288(6)  | O1-Dy1-O5                | 118.9(3) |
| Dy1-O2 <sup>2</sup> | 2.361(6)  | O1-Dy1-N1                | 136.2(3) |
| Dy1-O3 <sup>3</sup> | 2.444(6)  | O1-Dy1-O3A               | 128.6(3) |
| Dy1-O3              | 2.496(6)  | O1W-Dy1-O3               | 69.8(2)  |
| Dy1-O4 <sup>4</sup> | 2.335(7)  | O1W-Dy1-O3 <sup>2</sup>  | 74.4(2)  |
| Dy1-O5              | 2.635(10) | O1W-Dy1-O5               | 68.7(3)  |
| Dy1-N1              | 2.606(16) | O1W-Dy1-N1               | 88.7(4)  |
| Dy1-O3A             | 2.496(6)  | O1W-Dy1-O3A              | 69.8(2)  |
| Dy2-O2 <sup>1</sup> | 2.379(6)  | O2 <sup>3</sup> -Dy1-O1  | 69.1(2)  |
| Dy2-O2 <sup>5</sup> | 2.379(6)  | O2-Dy1-O2 <sup>3</sup>   | 73.9(3)  |
| Dy2-O2 <sup>6</sup> | 2.379(6)  | O2-Dy1-O3 <sup>2</sup>   | 92.4(2)  |
| Dy2-O2 <sup>7</sup> | 2.379(6)  | O2 <sup>3</sup> -Dy1-O3A | 139.1(2) |
| Dy2-O5              | 2.504(11) | O2-Dy1-N1                | 126.1(3) |

Symmetry transformations used to generate equivalent atoms:

<sup>1</sup>+Y-X,1-X,+Z;<sup>2</sup>1-X,1-Y,1-Z;<sup>3</sup>1-Y,1+X-Y,+Z;<sup>4</sup>+Y,1-X+Y,1-Z; <sup>5</sup>1-Y,1+X-Y,3/2-Z; <sup>6</sup>+Y-X,1-X,3/2-Z; <sup>7</sup>+X,+Y,3/2-Z

**Table S3.** The CShM (Continuous Shape Measurements) values of Gd<sup>III</sup> and Dy<sup>III</sup> atoms with a nona-coordinate mode.

| Com. <sup>b</sup><br>Refocde <sup>a</sup> | <b>1Gd</b>     |              | <b>2Dy</b>    |              |
|-------------------------------------------|----------------|--------------|---------------|--------------|
|                                           | Gd1            | Gd2          | Dy1           | Dy2          |
| EP-9                                      | 33.370/        | 35.424       | 31.397/       | 37.540       |
| OPY-9                                     | 29.118/        | 21.904       | 22.512/       | 21.634       |
| HBPY-9                                    | 25.450/        | 17.888       | 17.643/       | 20.017       |
| JTC-9                                     | 21.302/        | 15.720       | 15.253/       | 17.009       |
| JCCU-9                                    | 19.329/        | 10.529       | 11.277/       | 10.467       |
| CCU-9                                     | 17.806/        | 9.337        | 9.025/        | 9.317        |
| JCSAPR-9                                  | 12.859/        | 2.092        | 12.985/       | 2.451        |
| CSAPR-9                                   | 11.088/        | <b>1.201</b> | 11.553/       | 1.601        |
| JTCTPR-9                                  | 12.230/        | 2.196        | 12.683/       | 2.378        |
| TCTPR-9                                   | <b>10.298/</b> | 1.275        | 12.308/       | <b>0.598</b> |
| JTDIC-9                                   | 20.289/        | 13.333       | 11.643/       | 11.793       |
| HH-9                                      | 17.951/        | 9.993        | <b>8.821/</b> | 11.510       |
| MFF-9                                     | 10.759/        | 1.774        | 10.182/       | 1.787        |

<sup>a</sup> EP-9, Enneagon; OPY-9, Octagonal pyramid; HBPY-9, Heptagonal bipyramid; JTC-9, Johnson triangular cupola J3; JCCU-9, Capped cube J8; CCU-9, Spherical-relaxed capped cube; JCSAPR-9, Capped square antiprism J10; CSAPR-9, Spherical capped square antiprism; JTCTPR-9, Tricapped trigonal prism J51; TCTPR-9, Spherical tricapped trigonal prism; JTDIC-9, Tridiminished icosahedron J63; HH-9, Hula-hoop; MFF-9, Muffin. <sup>b</sup> The lanthanide ion in each asymmetric unit of compounds **1Gd** and **2Dy**.

**Table S4.**  $-\Delta S_m^{\max}$  value for some Gd<sup>III</sup>-based MOFs under  $\Delta H$  by the given temperature.

| Compounds                                                                                                                                                                                                | $-\Delta S_m^{\max}$ (J<br>kg <sup>-1</sup> K <sup>-1</sup> ) | $\Delta H$ (T) | T<br>(K) | Dimensio<br>nality | Ref                  |
|----------------------------------------------------------------------------------------------------------------------------------------------------------------------------------------------------------|---------------------------------------------------------------|----------------|----------|--------------------|----------------------|
| [Ln <sub>5</sub> (μ <sub>3</sub> -OH) <sub>5</sub> (μ <sub>3</sub> -O)(CO <sub>3</sub> ) <sub>2</sub> (HCO <sub>2</sub> ) <sub>2</sub> (C <sub>4</sub> O <sub>4</sub> )(H <sub>2</sub> O) <sub>2</sub> ] | <b>64.0</b>                                                   | 9.0            | 3.0      | 3D                 | [1]                  |
| [Gd <sub>6</sub> (OH) <sub>8</sub> (suc) <sub>5</sub> nH <sub>2</sub> O]·2n(H <sub>2</sub> O)                                                                                                            | <b>42.8</b>                                                   | 7.0            | 2.0      | 3D                 | [2]                  |
| {[Ln <sub>4</sub> (L) <sub>3,5</sub> (μ <sub>3</sub> -OH) <sub>3</sub> (μ <sub>4</sub> -O)(H <sub>2</sub> O) <sub>2</sub> ]·H <sub>2</sub> O}n                                                           | <b>42.4</b>                                                   | 7.0            | 2.0      | 3D                 | [3]                  |
| H <sub>2</sub> L= 2,5-pyrazine dicarboxylic acid                                                                                                                                                         |                                                               |                |          |                    |                      |
| [Ln <sub>5</sub> (μ <sub>3</sub> OH) <sub>6</sub> (TZI) <sub>3</sub> (DMA) <sub>1,5</sub> (H <sub>2</sub> O) <sub>9,5</sub> ]·(DMA)n                                                                     | <b>41.3</b>                                                   | 7.0            | 2.5      | 3D                 | [4]                  |
| <b>1Gd</b>                                                                                                                                                                                               | <b>40.85</b>                                                  | 7.0            | 3.0      | 3D                 | <b>This<br/>work</b> |
| {[Gd(fum)(ox) <sub>0,5</sub> (H <sub>2</sub> O) <sub>2</sub> ]·2H <sub>2</sub> O}                                                                                                                        | <b>37.1</b>                                                   | 7.0            | 2.0      | 3D                 | [5]                  |
| Ln <sub>3</sub> (adipate) <sub>4,5</sub> (DMF) <sub>2</sub>                                                                                                                                              | <b>36.4</b>                                                   | 5.0            | 2.0      | 3D                 | [6]                  |



|                                                                                                                                         |              |     |     |    |      |
|-----------------------------------------------------------------------------------------------------------------------------------------|--------------|-----|-----|----|------|
| $(\text{H}_6\text{edte})_{0.5}[\text{Gd}^{\text{III}}(\text{ox})_2(\text{H}_2\text{O})]$                                                | <b>35.9</b>  | 9.0 | 2.0 | 3D | [7]  |
| $[\text{Na}@\text{Ln}_8(\text{EDTA})_6(\text{H}_2\text{O})_{22}] \cdot \text{ClO}_4 \cdot 28\text{H}_2\text{O}\}_n$                     | <b>32.8</b>  | 7.0 | 2.0 | 3D | [8]  |
| $[\text{Gd}_2(\text{N-BDC})_3(\text{dmf})_4]_n$                                                                                         | <b>29.0</b>  | 7.0 | 1.8 | 3D | [9]  |
| $\{\text{H}_2[\text{Gd}_6(\text{OH})_8(\text{H}_2\text{O})_6(\text{p-BDC-F}_4)_6] \cdot 3(2,2'\text{-bpy}) \cdot 6\text{H}_2\text{O}\}$ | <b>28.27</b> | 8.0 | 2.0 | 3D | [10] |

## References:

1. S. Biswas, A. K. Mondal and S. Konar, *Inorg. Chem.*, 2016, **55**, 2085.
2. Y.C. Chen, F. S. Guo, Y. Z. Zheng, J. L. Liu, J. D. Leng, R. Tarasenko, M. Orendáč, J. Prokleška, V. Sechovský and M. L. Tong, *Chem. Eur. J.*, 2013, **19**, 13504.
3. T. Q. Lu, L. T. Cheng, X. T. Wang, C. Chen, J. Zheng, D. F. Lu and X. Y. Zheng, *Cryst. Growth Des.*, 2022, **22**, 4917.
4. F. Liu, H. Huang, W. Gao, X. M. Zhang and J. P. Liu, *CrystEngComm*, 2017, **19**, 3660.
5. S. J. Liu, T. F. Zheng, J. Bao, P. P. Dong, J. S. Liao, J. L. Chen, H. R. Wen, J. Xu and X. H. Bu, *New J. Chem.*, 2015, **39**, 6970.
6. P. W. Doheny, S. J. Cassidy and P. J. Saines, *Inorg. Chem.*, 2022, **61**, 4957.
7. M. N. Akhtar, Y. C. Chen, M. A. AlDamen and M. L. Tong, *Dalton Trans.*, 2017, **46**, 116.
8. T. Q. Lu, X. T. Wang, L. T. Cheng, C. Chen, H. Y. Shi, J. Zheng and X. Y. Zheng, *Cryst. Growth Des.*, 2021, **21**, 7065.
9. G. Lorusso, M. A. Palacios, G. S. Nichol, E. K. Brechin, O. Roubeau and M. Evangelisti, *Chem. Commun.*, 2012, **48**, 7592.
10. W. Wei, X. Wang, K. Zhang, C. B. Tian and S. W. Du, *Cryst. Growth Des.*, 2019, **19**, 55.
